# Supplementary material for: RpoN Regulates Virulence Factors of Pseudomonas aeruginosa via Modulating the PqsR Quorum Sensing Regulator
Source: PubMed Central journal article supplement (PMC4691050; doi:10.3390/ijms161226103), 2015-11-30
Supplement: ijms-16-26103-s001.pdf [file ijms-16-26103-s001.pdf]

# Supplementary Materials: RpoN Regulates Virulence Factors of *Pseudomonas aeruginosa* via Modulating the PqsR Quorum Sensing Regulator

Zhao Cai, Yang Liu, Yicai Chen, Joey Kuok Hoong Yam, Su Chuen Chew, Song Lin Chua, Ke Wang, Michael Givskov and Liang Yang

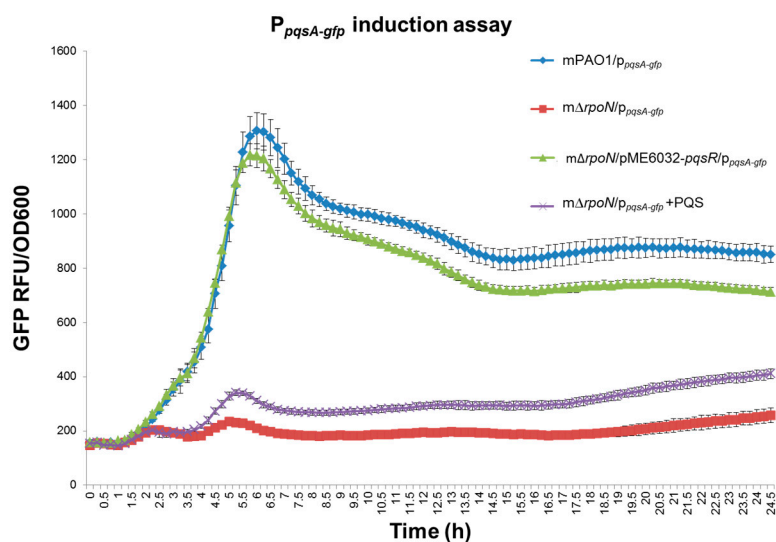

**Figure S1.** Induction of *p<sub>pqsA-gfp</sub>* transcriptional fusion in mPAO1 wild-type, mPAO1/ $\Delta$ *rpoN*, mPAO1/ $\Delta$ *rpoN*/pME6032-*pqsR* and mPAO1/ $\Delta$ *rpoN* + PQS (2-heptyl-3-hydroxy-4(1H)-quinolone) (10  $\mu$ M). Cultures were monitored for their *gfp* fluorescence by using a Tecan Infinite Pro2000 microplate reader. Means and standard deviations (S.D.) in relative fluorescence units (RFU) from triplicate experiments are shown.
